# Supplementary material for: Novel Candidate Genes and a Wide Spectrum of Structural and Point Mutations Responsible for Inherited Retinal Dystrophies Revealed by Exome Sequencing
Source: PLoS One. 2016 Dec 22;11(12):e0168966. doi: 10.1371/journal.pone.0168966 (PMC5179108; doi:10.1371/journal.pone.0168966)
Supplement: S2 Table — (XLS) [file pone.0168966.s005.xls]

## Sheet: Hoja1
Gene	Mutation	ACMG classifi-cation	ACMG criteria for classifying pathogenic variants
C21orf2	c.286G>A p.E96K	Likely P.		PM2	PM3	PP3			PP1
	c.631_632del p.R211Hfs*46	Pathog.	PVS1	PM2		PP3			PP1
PHYH	c.668C>G p.P223R	Likely P.		PM2	PM3	PP3		PP2
	c.683dupG p.V229Sfs*2	Pathog.	PVS1	PM2		PP3	PP5
USH2A	c.2299delG p.E767Sfs*21	Pathog.	PVS1	PM2	PM3		PP5		PP1
	c.9119G>A p.W3040*	Pathog.	PVS1	PM2		PP3	PP5		PP1
ABCA4	c.3386G>T p.R1129L	Likely P.		PM2		PP3	PP5	PP2	PP1
	c.4539+2064C>T	VUS					PP5		PP1
BBS2	c.334T>C p.F112L	VUS		PM2		PP3		PP2	PP1
C2orf71	c.1067_1068del p.N356Rfs*101	Pathog.	PVS1	PM2		PP3
CEP290	c.148C>T p.H50Y	VUS		PM2		PP3		PP2
	c.1322T>A p.L441*	Pathog.	PVS1	PM2		PP3
CERKL	c.613+5_613+8del	VUS		PM2
CNGA3	c.1768G>A p.E590K	VUS		PM2		PP3	PP5	PP2
CNGB1	c.2762_2765delACGA p,Y921Cfs*15	Pathog.	PVS1	PM2					PP1
CNGB3	c.1148delC p.T383Ifs*13	Pathog.	PVS1	PM2			PP5
CRB1	c.2688T>A p.C896*	Pathog.	PVS1	PM2		PP3	PP5
	c.2842T>C p.C948R	Likely P.	PM5	PM2		PP3		PP2
CRX	Deletion exons 3-4	Pathog.	PVS1	PM2					PP1*
EYS	c.2380C>T p.R794*	Pathog.	PVS1	PM2		PP3
	Deletion 10 initial exons	Pathog.	PVS1	PM2	PM3
GUCY2D	c.914delA p.H305Pfs*90	Pathog.	PVS1	PM2		PP3			PP1
NRL	c.339C>G p.Y113*	Pathog.	PVS1	PM2		PP3			PP1
OPA1	c.800_801delAA p.K267Rfs*4	Pathog.	PVS1						PP1	PP4
PRPF31	Partial deletion & duplication	Pathog.	PVS1	PM2					PP1
RPGR	c.762_777delinsCA p.T255Rfs*23	Pathog.	PVS1	PM2	PM1
UNC119	c.7delG p.V3*	Likely P.	PVS1	PM2
USH2A	c.1724G>A p.C575Y	Likely P.		PM2		PP3	PP5	PP2	PP1
	c.2276G>T p.C759F	Likely P.		PM2		PP3	PP5	PP2	PP1
USH2A	c.2276G>T p.C759F	Likely P.		PM2		PP3	PP5	PP2	PP1
	c.13010C>T p.T4337M	Likely P.		PM2		PP3	PP5	PP2	PP1
CNGB3	c.1672G>T p.G558C	VUS				PP3	PP5	PP2
CRB1	c.1702C>T p.H568Y	VUS		PM2		PP3	PP5	PP2
ROM1	c.668G>A p.R223Q	VUS	PM5			PP3
PDE6B	c.928-9_940dup p.Y314Cfs*50	Pathog.	PVS1	PM2			PP5
USH2A	c.1246G>T p.A416S	VUS		PM2		PP3		PP2
CEP250	c.1826C>T p.A609V	Likely P.	PS3	PM2		PP3
CEP78	c.1056delT p.T353Lfs*5	VGUS	PVS1	PM2		PP3
SCLT1	c.778-2A>T	Pathog.	PVS1	PM2		PP3
	c.827G>A p.R276H	VUS		PM2	PM3	PP3
SEMA6B	c.493G>A p.G165R	VGUS		PM2		PP3
*Consider as stonger evidence as the huge number of afected members in the family
VUS: Variant of uncertain significance; VGUS: Variant in a gene of uncertain significance
